# Supplementary material for: Adverse Pathology after Radical Prostatectomy of Patients Eligible for Active Surveillance—A Summary 7 Years after Introducing mpMRI-Guided Biopsy in a Real-World Setting
Source: MDPI journal article supplement (doi:10.3390/bioengineering10020247), 2023-02-13
Supplement: s1 [file s1]

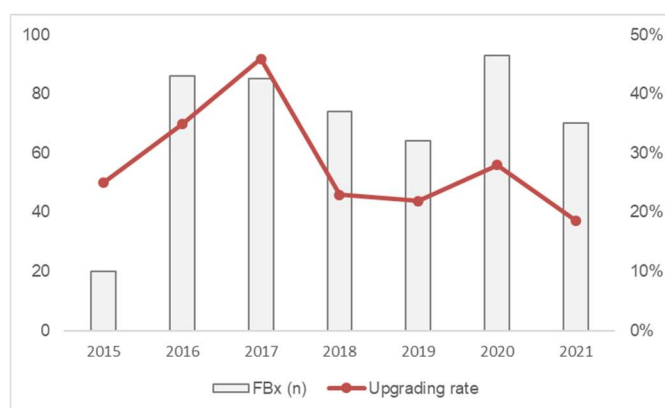

**Supplementary Figure S1.** Upgrading rate of all FBx patients (mp-MRI-fusion guided biopsy of the prostate) after radical prostatectomy over time. March 2015 – February 2016 vs. March 2021 – February 2022;  $p = 0.53$ .

**Supplementary Table S1.** Characteristics of the upgrading in the FBx AS cohort

| Baseline Characteristic       | Gleason score upgrading, n = 16 | No Gleason score upgrading, n = 13 | p-value |
|-------------------------------|---------------------------------|------------------------------------|---------|
| <b>Age (years)</b>            | 65.4 ± 8.3                      | 63.5 ± 6.4                         | 0.49    |
| <b>Positive PB cores (n)</b>  |                                 |                                    | 0.36    |
| 1                             | 6 (37.5%)                       | 8 (61.5%)                          |         |
| 2                             | 10 (62.5%)                      | 5 (38.5%)                          |         |
| <b>PB cores (n)</b>           |                                 |                                    | 0.093   |
| 13                            | 12 (75.0%)                      | 12 (92.3%)                         |         |
| 14                            | 4 (25.0%)                       | 0 (0.0%)                           |         |
| 15                            | 0 (0.0%)                        | 1 (7.7%)                           |         |
| <b>Infiltration at PB (%)</b> | 16.6 ± 14.3                     | 10.6 ± 9.7                         | 0.20    |
| <b>iPSA (ng/ml)</b>           | 6.3 ± 1.7                       | 5.7 ± 1.9                          | 0.33    |
| <b>Prior biopsy (n)</b>       | 5 (45.5%)                       | 4 (36.4%)                          | >0.99   |
| <b>Highest PI-RADS score</b>  |                                 |                                    | 0.59    |
| 3                             | 3 (18.8%)                       | 1 (7.7%)                           |         |
| 4                             | 9 (56.2%)                       | 7 (53.8%)                          |         |
| 5                             | 4 (25.0%)                       | 5 (38.5%)                          |         |
| <b>Prostate volume (mL)</b>   | 42.3 ± 31.4                     | 55.6 ± 25.5                        | 0.31    |
| <b>Positive DRE</b>           | 3 (60.0%)                       | 1 (16.7%)                          | 0.39    |

| Baseline Characteristic       | Gleason score upgrading, n = 16 | No Gleason score upgrading, n = 13 | p-value |
|-------------------------------|---------------------------------|------------------------------------|---------|
| Time between PB and RP (days) | 186.4 ± 202.6                   | 159.6 ± 240.2                      | 0.75    |
| Mean operative time (min)     | 106.5 ± 55.8                    | 132.2 ± 63.2                       | 0.26    |
| T Stage after RP              |                                 |                                    | 0.12    |
| 2a                            | 1 (6.2%)                        | 5 (38.5%)                          |         |
| 2b                            | 2 (12.5%)                       | 0 (0.0%)                           |         |
| 2c                            | 11 (68.8%)                      | 6 (46.2%)                          |         |
| 3a                            | 1 (6.2%)                        | 2 (15.4%)                          |         |
| 3b                            | 1 (6.2%)                        | 0 (0.0%)                           |         |

**Supplementary Table S2.** Upgrading and staging of AS-eligible SBx patients.

| Histopathology after SBx | Histopathology after RP | n = | %    |
|--------------------------|-------------------------|-----|------|
| GS 6, pT2a               | GS 6 and pT2a           | 15  | 6.9  |
|                          | GS 6 and >pT2a          | 111 | 51.2 |
|                          | GS 7a                   | 77  | 35.5 |
|                          | GS 7b                   | 10  | 4.6  |
|                          | GS 8                    | 2   | 0.9  |
|                          | GS 9                    | 2   | 0.9  |
|                          | GS 10                   | 0   | 0.0  |

**Supplementary Table S3.** Univariate and multivariable logistic regression analyses of upgraded GS 6 FBx patients (n = 132).

| Characteristic                                    | OR    | Univariate 95% CI | p-value | OR   | Multivariable 95% CI | p-value |
|---------------------------------------------------|-------|-------------------|---------|------|----------------------|---------|
| Age                                               | 1.03  | 0.99, 1.08        | 0.20    | 1.01 | 0.96, 1.07           | 0.60    |
| Percent of positive PB cores                      | 11.80 | 1.49, 110         | 0.02    | 4.65 | 0.43, 58.2           | 0.20    |
| Highest infiltration of the obtained biopsy cores | 1.02  | 1.01, 1.04        | 0.01    | 1.02 | 1.00, 1.03           | 0.10    |
| iPSA                                              | 1.00  | 0.96, 1.03        | 0.80    | 1.00 | 0.96, 1.04           | >0.9    |
| Highest PI-RADS score                             | 1.32  | 0.81, 2.18        | 0.30    | 1.28 | 0.76, 2.18           | 0.40    |
| Time between FBx and RP                           | 1.00  | 0.99, 1.01        | 0.80    | 1.00 | 0.99, 1.01           | 0.40    |
